# Supplementary material for: Synergistic effects of Ir–Au/TiO2catalysts in the total oxidation of propene: influence of the activation conditions
Source: Royal Society of Chemistry journal article supplement (doi:10.1039/c5cp00590f), 2015-01-01
Supplement: c5cp00590f1.pdf [file c5cp00590f1.pdf]

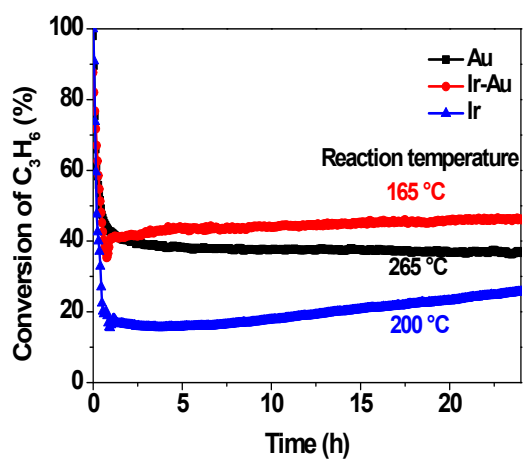

Fig. 1S Evolution of conversion of propene as a function of time on stream of reaction mixture over monometallic Au/TiO<sub>2</sub>, Ir/TiO<sub>2</sub> and bimetallic Ir-Au/TiO<sub>2</sub> samples activated at 400 °C under H<sub>2</sub>.
